# Supplementary material for: Design and Characterization of a new OFR: The Particle FormationAccelerator (PFA)
Source: Copernicus journal article supplement (doi:10.5194/amt-2020-373), 2020-10-30
Supplement: Supplementary file [file amt-2020-373-AC4-supplement.pdf]

## **Response to editor:**

On the manuscript Interactive comment on “**Design and Characterization of a new OFR: The Particle Formation Accelerator (PFA)**” by Xu and Collins., submitted to Atmospheric Measurement Techniques.

1. Should the full name of OFR be included in the title of this manuscript?

Answer: Thanks for the recommendation. We retitled the paper “Design and Characterization of a new OFR for laboratory and long-term ambient studies”
